# Supplementary material
Source: publisher site journal article supplement (https://www.spandidos-publications.com/5666/downloadSupplementary)
Supplement: Supplementary file 1 [file downloadSupplementary]

## Sheet: Sheet1
Table SII. Abundance of gene mutations in osimertinib-resistant and- sensitive cell lines.
Sample ID	Gene	DNA change	Amino acid change	Abundance
HCC827	TP53	c.652_654delGTG	p.V218del	0.90521
HCC827	EGFR	c.2236_2250delGAATTAAGAGAAGCA	p.E746_A750del	0.838889
HCC827	DPYD	c.2041G>T	p.G681C	0.338266
HCC827	VEGFA	c.543G>A	p.M181I	0.242972
HCC827	PIK3R1	c.811A>G	p.M271V	0.0768176
HCC827	CDK4	c.224T>C	p.M75T	0.0055191
HCC827-OR	TP53	c.652_654delGTG	p.V218del	0.887427
HCC827-OR	EGFR	c.2236_2250delGAATTAAGAGAAGCA	p.E746_A750del	0.732646
HCC827-OR	DPYD	c.2041G>T	p.G681C	0.318898
HCC827-OR	LRP1B	c.463+1G>C	.	0.0108844
HCC827-OR	KMT2A	c.2246G>T	p.R749I	0.0073846
H1975	TP53	c.818G>A	p.R273H	1
H1975	CDKN2A	c.205G>T	p.E69*	0.997465
H1975	EGFR	c.2573T>G	p.L858R	0.786421
H1975	EGFR	c.2369C>T	p.T790M	0.784259
H1975	LRP1B	c.7218delG	p.T2407Lfs*48	0.636232
H1975	PIK3CA	c.353G>A	p.G118D	0.520857
H1975	LRP1B	c.2770+1G>A	.	0.357314
H1975	APC	c.6401C>G	p.S2134C	0.312102
H1975	LRP1B	c.538T>C	p.C180R	0.237852
H1975	PBRM1	c.889C>A	p.L297I	0.170316
H1975	BRAF	c.1342G>A	p.D448N	0.0268551
H1975	TET2	BMPR1B:5'UTR~TET2:exon3	BMPR1B:5'UTR~TET2:exon3	0.1813
H1975-OR	EGFR	c.2369C>T	p.T790M	0.998165
H1975-OR	TP53	c.818G>A	p.R273H	0.99761
H1975-OR	CDKN2A	c.205G>T	p.E69*	0.997465
H1975-OR	EGFR	c.2573T>G	p.L858R	0.760193
H1975-OR	LRP1B	c.7218delG	p.T2407Lfs*48	0.626335
H1975-OR	APC	c.6401C>G	p.S2134C	0.34173
H1975-OR	LRP1B	c.2770+1G>A	.	0.337611
H1975-OR	LRP1B	c.538T>C	p.C180R	0.327392
H1975-OR	PIK3CA	c.353G>A	p.G118D	0.319797
H1975-OR	EGFR	c.3466C>A	p.H1156N	0.266596
H1975-OR	EGFR	c.2390_2391delGCinsCG	p.C797S	0.9799
H1975-OR	TET2	BMPR1B:5'UTR~TET2:exon3	BMPR1B:5'UTR~TET2:exon3	0.2551
